# Supplementary material
Source: PubMed Central journal article supplement (PMC7821437)
Supplement: NIHMS1599085-supplement-2.pdf [file NIHMS1599085-supplement-2.pdf]

## Supplementary Figures and Tables

| Cancer Symbol | Cancer Type                                                      | Number of Patients | Number of Mutated Genes |         |         |
|---------------|------------------------------------------------------------------|--------------------|-------------------------|---------|---------|
|               |                                                                  |                    | Total                   | Average | Cut off |
| ACC           | Adrenocortical carcinoma                                         | 76                 | 2068                    | 32.1    | 80      |
| BLCA          | Bladder Urothelial Carcinoma                                     | 196                | 11407                   | 135.7   | 300     |
| BRCA          | Breast invasive carcinoma                                        | 882                | 10813                   | 27      | 80      |
| CESC          | Cervical squamous cell carcinoma and endocervical adenocarcinoma | 173                | 6907                    | 63      | 200     |
| COAD          | Colon adenocarcinoma                                             | 153                | 6521                    | 74.4    | 150     |
| GBM           | Glioblastoma multiforme                                          | 278                | 7250                    | 46.8    | 80      |
| HNSC          | Head and Neck squamous cell carcinoma                            | 435                | 13048                   | 87.9    | 200     |
| KICH          | Kidney Chromophobe                                               | 64                 | 661                     | 11      | 50      |
| KIRC          | Kidney renal clear cell carcinoma                                | 416                | 9212                    | 40.9    | 100     |
| KIRP          | Kidney renal papillary cell carcinoma                            | 166                | 5687                    | 47.7    | 100     |
| LGG           | Brain Lower Grade Glioma                                         | 451                | 7130                    | 28.8    | 60      |
| LIHC          | Liver hepatocellular carcinoma                                   | 196                | 7705                    | 67.3    | 200     |
| LUAD          | Lung adenocarcinoma                                              | 487                | 15481                   | 172.8   | 500     |
| LUSC          | Lung squamous cell carcinoma                                     | 167                | 12264                   | 212     | 500     |
| OV            | Ovarian serous cystadenocarcinoma                                | 138                | 3390                    | 30.7    | 80      |
| PAAD          | Pancreatic adenocarcinoma                                        | 124                | 3228                    | 36.8    | 100     |
| PCPG          | Pheochromocytoma and Paraganglioma                               | 183                | 1819                    | 11.7    | 30      |
| PRAD          | Prostate adenocarcinoma                                          | 238                | 4792                    | 28.1    | 50      |
| READ          | Rectum adenocarcinoma                                            | 34                 | 1214                    | 40.7    | 150     |
| SKCM          | Skin Cutaneous Melanoma                                          | 329                | 14748                   | 240.1   | 1000    |
| STAD          | Stomach adenocarcinoma                                           | 242                | 10595                   | 103.5   | 500     |
| THCA          | Thyroid carcinoma                                                | 401                | 2268                    | 7.4     | 30      |
| UCEC          | Uterine Corpus Endometrial Carcinoma                             | 155                | 4282                    | 38.8    | 100     |
| UCS           | Uterine Carcinosarcoma                                           | 54                 | 1787                    | 38.9    | 80      |

Table S1: **TCGA dataset and statistics.** We list the 24 cancer types studied along with their abbreviations. For each cancer type, we give the total number of patient samples considered after highly mutated samples are filtered out, the total number of mutated genes across these samples, the average number of mutated genes across all samples, and the cutoff on the number of mutated genes within a sample that was used to filter samples. Related to STAR Methods.

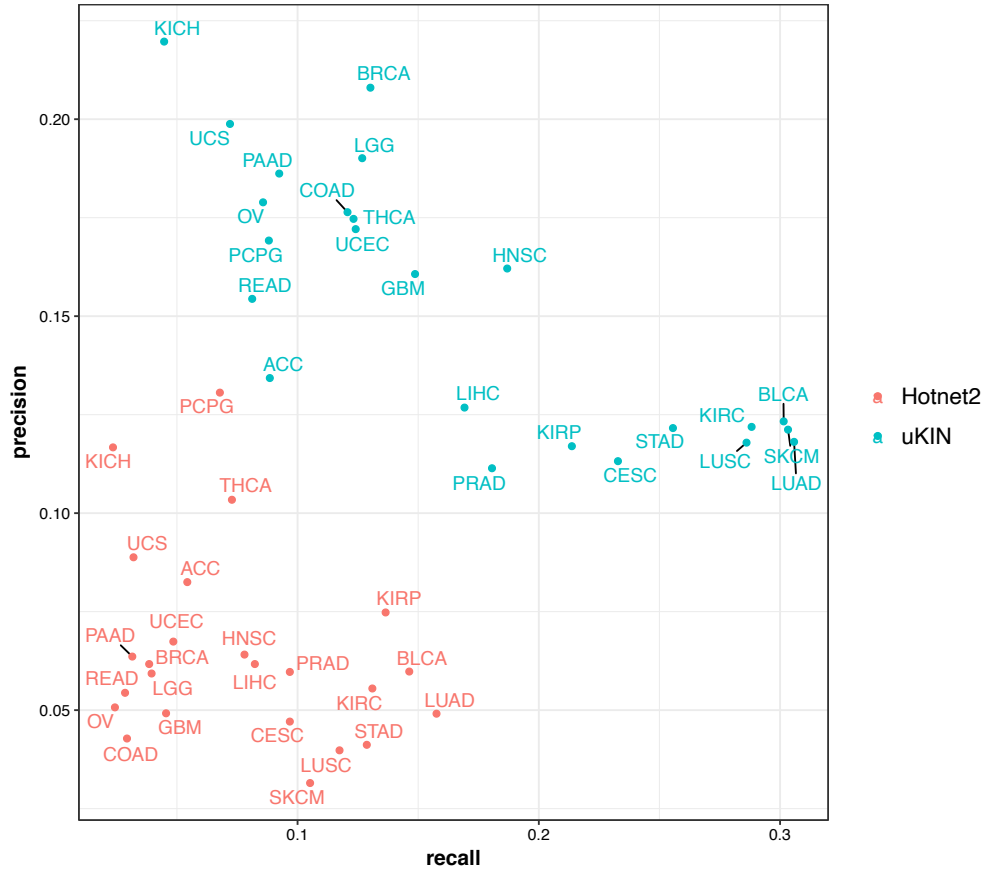

Figure S1: **Comparison between uKIN and Hotnet2.** For each cancer type, we compute the precision and recall of the genes returned by uKIN with  $\alpha=0.5$  and Hotnet2. Hotnet2 is run with default parameters (100 permuted networks, and  $\beta = 0.2$  for the restart probability for the insulated heat diffusion process). Hotnet2 outputs a set of genes predicted to be cancer-relevant, and these genes are not ranked. Thus, for uKIN, we consider the same number of top scoring genes as output by Hotnet2. uKIN exhibits both higher precision and higher recall than Hotnet2 across all 24 cancer types.

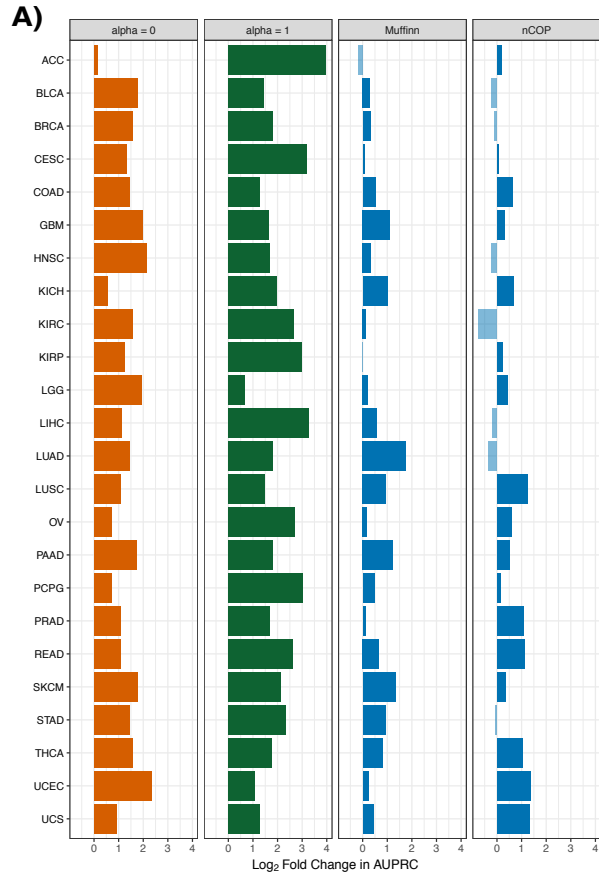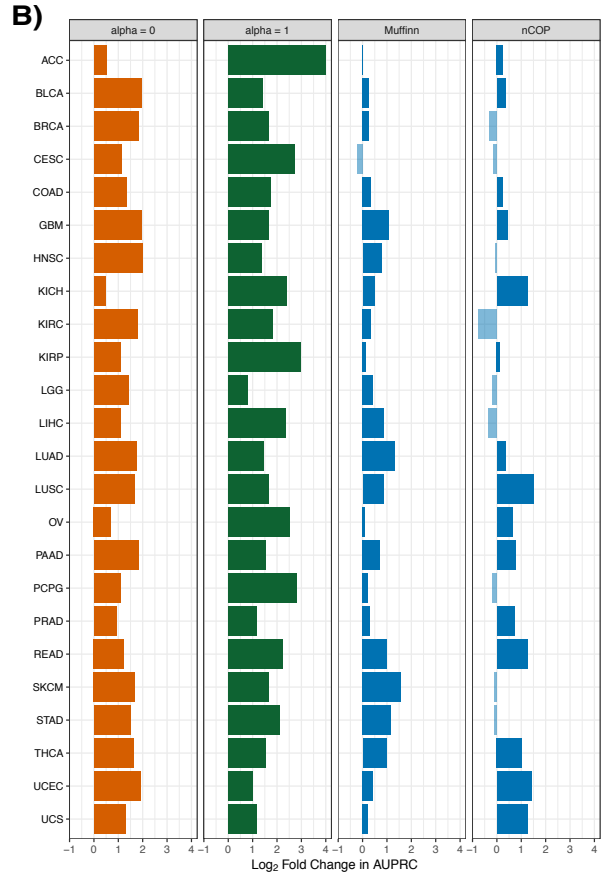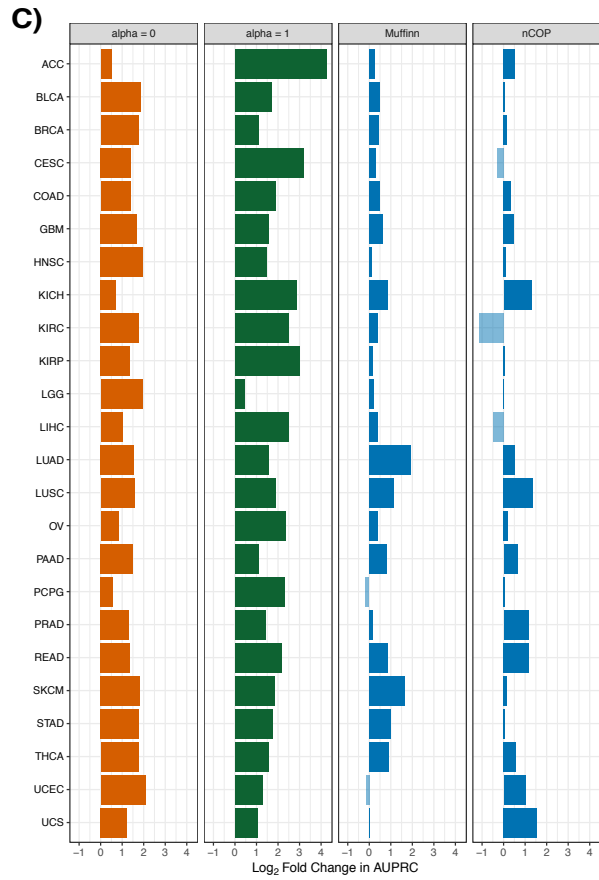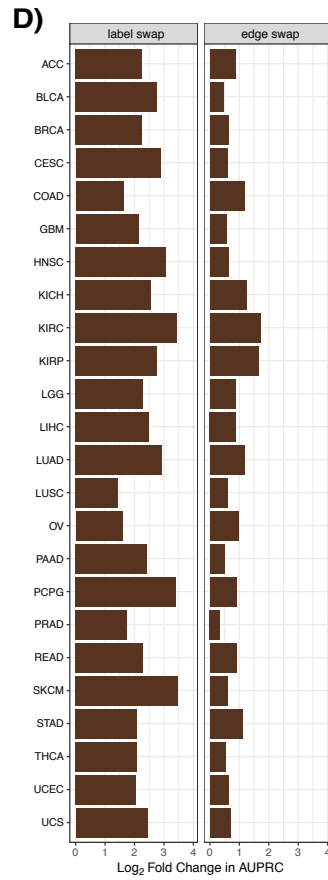

Figure S2: **Robustness of  $u_{KIN}$ .** **(A)** To make sure that the results reported for  $u_{KIN}$  are robust with respect to the set of labelled cancer genes  $\mathcal{H}$ , instead of randomly sampling 400 genes from the Cancer Gene Census (CGC) list, we form  $\mathcal{H}$  using genes from other sources. Specifically, we aggregate the cancer genes provided by Hofree et al. in [57] (which they obtained by querying the UniprotKB database for the keyword-terms ‘proto-oncogene,’ ‘oncogene’ and ‘tumoursuppressor’ gene) and Vogelstein et al. [58], excluding any genes present in the set of prior knowledge  $\mathcal{K}$ . Log-fold AUPRCs are computed as described in the main text. The results are consistent with those shown in Figures 3 and 4 based on the CGC list and show the superior performance of  $u_{KIN}$  as compared to the other methods in recapitulating known cancer genes. **(B)** To make sure that the results reported for  $u_{KIN}$  are robust with respect to number of genes used in evaluation, we compute AUPRCs using the top 50 predicted genes. The results are consistent with those shown in Figures 3 and 4, which use the top 100 predicted genes, and show the superior performance of  $u_{KIN}$  as compared to the baselines and other methods in recapitulating known cancer genes. The results are also consistent when computing AUPRC’s using 150 genes (data not shown). **(C)** To make sure that our method is robust with respect to the specific network utilized, we repeat our entire analysis procedure for  $u_{KIN}$  with  $\alpha = 0.5$  using the Biogrid network. The results are consistent with those shown in Figures 3 and 4, based on the HPRD network. **(D)** To make sure our method utilizes network structure appropriately, we also consider performance of  $u_{KIN}$  on the real HPRD network as compared to randomized HPRD networks. In the left panel, we use a node label shuffling randomization where the network structure is maintained but gene names are swapped (thereby genes can have very different numbers of interactions in the randomizations). In the right panel, we use a classic degree-preserving randomization (edge swapping). For each of the 24 cancers, we compute the  $\log_2$  ratio of the area under the precision recall curve using  $u_{KIN}$  with  $\alpha = 0.5$  on the real network and on the randomized network and show the average over 10 different randomizations. Performance, as expected, is worse for both randomizations across all cancers. We note that significant cancer-relevant information is retained in these randomized networks. In particular, in both types of network randomizations, we maintain the relationships between genes and the samples that they are found to be somatically mutated in. Thus, some highly mutated CGC genes may still be output by  $u_{KIN}$  when running on randomized networks. Related to Figure 4.

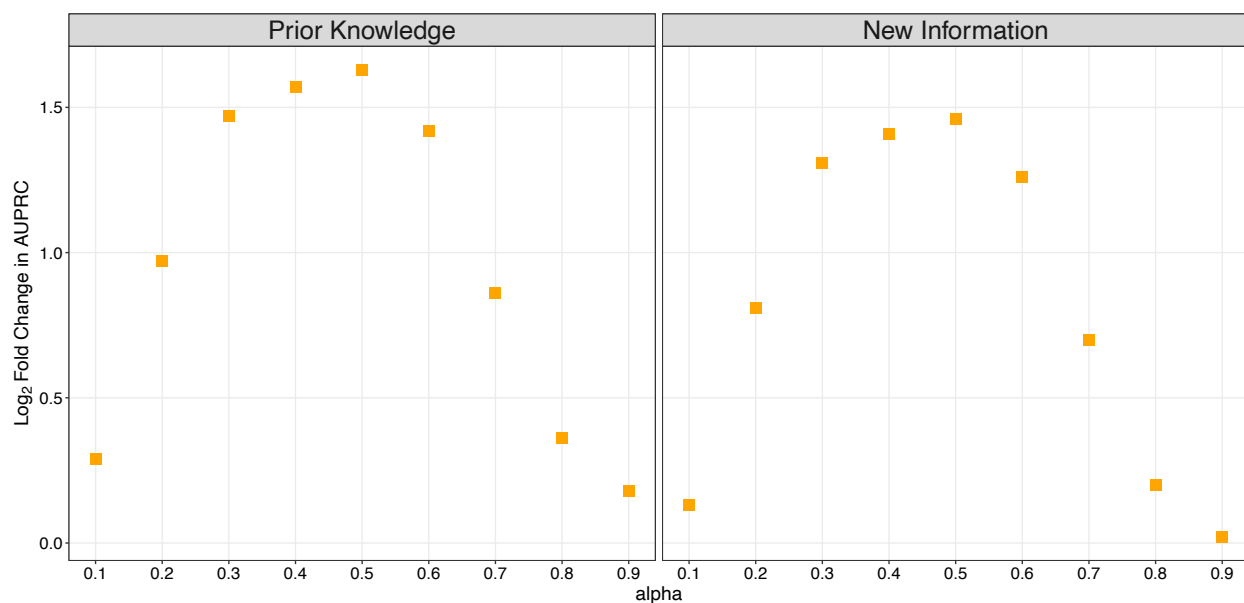

Figure S3: **Integrating both prior and new information via a wide range of  $\alpha$  outperforms using only prior data or only new data.** uKIN is run with  $0.1 \leq \alpha \leq 0.9$  on the glioblastoma (GBM) dataset as described in the main manuscript, and then compared to the baseline approaches of **(Left)** using only prior knowledge ( $\alpha = 0$ ) or **(Right)** using only new information ( $\alpha = 1$ ). As in the main manuscript, all runs use the HPRD network and for each value of  $\alpha$  ( $x$ -axis), we show the  $\log_2$  ratio, averaged over 100 runs, of the AUPRC of uKIN using that  $\alpha$  to the AUPRC for the baseline method. We note that the data in (A) and (B) are linear transformations of each other because  $\log_2(\text{AUPRC of uKIN with } \alpha = x / \text{AUPRC of uKIN with } \alpha = 0) = \log_2(\text{AUPRC of uKIN with } \alpha = x / \text{AUPRC of uKIN with } \alpha = 1) + \log_2(\text{AUPRC of uKIN with } \alpha = 1 / \text{AUPRC of uKIN with } \alpha = 0)$ . Related to Figure 4.

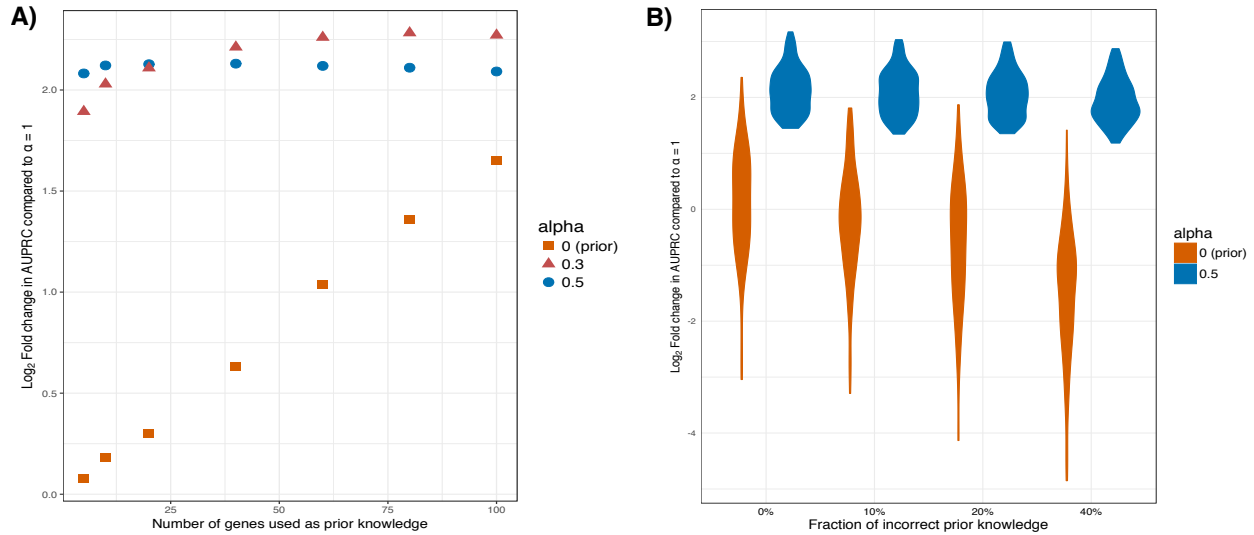

Figure S4: **(A)  $\mathfrak{u}$ KIN benefits from more knowledge.** As we consider larger numbers of genes comprising the set of prior knowledge ( $|\mathcal{K}| = 5, 10, 20, 40, \dots, 100$ ), we examine the ability of  $\mathfrak{u}$ KIN to uncover CGC genes in the same fixed set  $\mathcal{H}$  when using  $\alpha = 0.5$  (blue circles),  $\alpha = 0.3$  (pink triangles) or  $\alpha = 0$  (orange squares).  $\mathfrak{u}$ KIN is run on the HPRD network with the kidney renal clear cell carcinoma (KIRC) dataset. We show the  $\log_2$  ratio, averaged over 100 runs, of the AUPRC of each version of  $\mathfrak{u}$ KIN to the AUPRC for  $\alpha = 1$  which is constant across all possible  $\mathcal{K}$  (and corresponds to the case where genes are ranked by mutational frequency). For small  $\mathcal{K}$ ,  $\alpha = 0$  performs poorly as is expected; as the prior knowledge available increases so does the performance. For both  $\alpha = 0.3$  and  $\alpha = 0.5$ , an increase in the size of  $\mathcal{K}$  leads to an initial increase in the performance but eventually performance plateaus. When limited prior knowledge is available ( $|\mathcal{K}| < 20$ ),  $\alpha = 0.5$ , which uses more of the new information, does better than  $\alpha = 0.3$ , which relies more on using prior knowledge. When prior knowledge is abundant ( $|\mathcal{K}| > 40$ ),  $\mathfrak{u}$ KIN with  $\alpha = 0.3$  outperforms  $\alpha = 0.5$ . As the number of genes comprising the set of prior knowledge increases, spreading information just from those genes ( $\alpha = 0$ ) improves in performance. This is consistent with the observed clustering of CGC genes within biological networks [21]. However, even when propagating information from 100 known cancer genes, the performance is worse than that when integrating it with new information (with either  $\alpha = 0.3$  or  $\alpha = 0.5$ , Figure 3A). **(B)  $\mathfrak{u}$ KIN is robust to small amounts of erroneous knowledge.** We replace a fraction of the CGCs in the set of prior knowledge genes  $\mathcal{K}$  with genes chosen uniformly at random from the set of non-CGC genes in the network. We consider the performance for  $\mathfrak{u}$ KIN with  $\alpha = 0$  and  $\alpha = 0.5$  when 0%, 10%, 20% and 30% of the prior knowledge genes are replaced with non-cancer genes. 100 randomizations are performed at each level of incorrect knowledge. For each run, performance is measured as the  $\log_2$  ratio of the AUPRC of  $\mathfrak{u}$ KIN (with either  $\alpha = 0$  or  $\alpha = 0.5$ ) to the AUPRC for the case where  $\mathfrak{u}$ KIN is run with  $\alpha = 1$  (which is constant).  $\mathfrak{u}$ KIN is run on the HPRD network with KIRC dataset with 20 CGC genes comprising the prior knowledge. Violin plots of this measure are shown for  $\alpha = 0$  (orange) and  $\alpha = 0.5$  (blue), jittered around the 0%, 10%, 20% and 30% tick marks. At  $\alpha = 0.5$ , while performance steadily decreases,  $\mathfrak{u}$ KIN remains robust to some incorrect knowledge ( $\leq 20\%$ ). As expected, for  $\alpha = 0$ , the decrease is more notable even when 10% of the prior knowledge is incorrect because in that case  $\mathfrak{u}$ KIN uses only prior knowledge. Related to Figure 4.

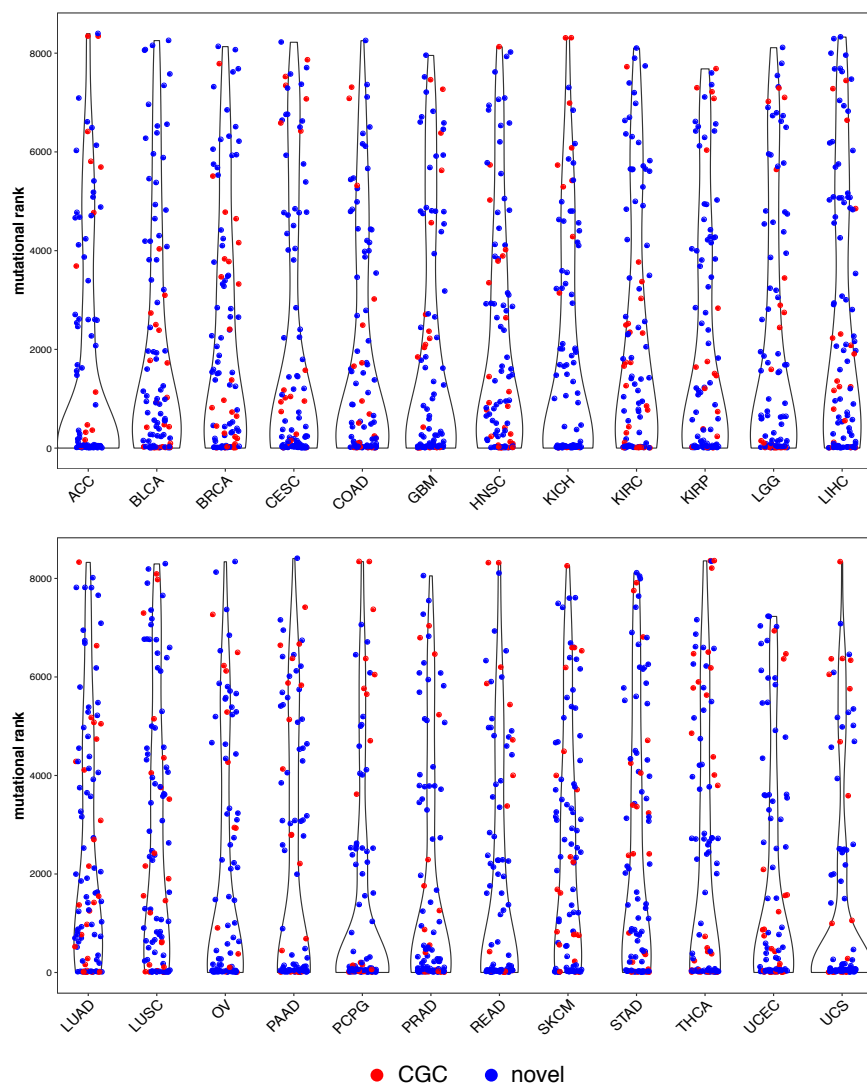

Figure S5: **uKIN identifies rarely mutated genes.** To illustrate uKIN’s ability to predict genes as cancer-relevant cancer even if they are mutated across fewer numbers of individuals, we consider mutation rates of uKIN’s top scoring genes. For each cancer type, we run uKIN 100 times with  $\alpha = 0.5$  and 20 genes as prior knowledge (see **Methods**). For each gene, its final score is obtained by averaging its scores (arising from the stationary distributions) across the runs; if a gene is in the set of prior knowledge genes  $\mathcal{K}$  for a run, this run is not considered for its final score. For each of the 100 genes with highest final scores, we consider the rank of its mutation rate ( $y$ -axis). The mutation rate of a gene is computed as the number of observed somatic missense and nonsense mutations across tumors of that cancer type, divided by the number of amino acids in the encoded protein. Then, for each cancer type, genes are ranked by mutation rate where the gene with the highest mutation rate is given the lowest rank. Known CGC genes are in red and novel predictions in blue. The top predictions consist of many heavily mutated genes (i.e., those with low ranks), but uKIN is also able to uncover known cancer genes with very low mutational ranks (red dots towards the top). Related to Figure 4.
